# Supplementary material for: Dioxins and related environmental contaminants increase TDP-43 levels
Source: PubMed Central journal article supplement (PMC5420162; doi:10.1186/s13024-017-0177-9), 2017-05-05
Supplement: 13024_2017_177_MOESM3_ESM.pdf [file 13024_2017_177_MOESM3_ESM.pdf]

Additional file 3: Figures

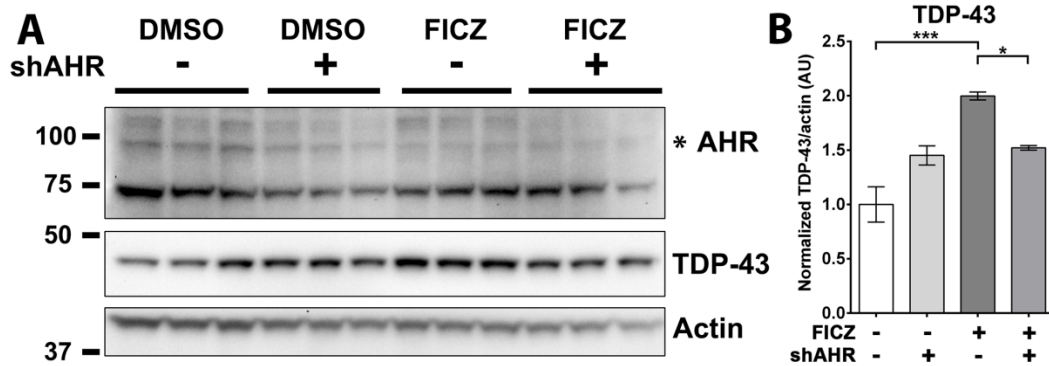

**Supplemental Figure 1. Elevation of endogenous TDP-43 is dependent upon AHR expression. A)** Immunoblots of stably expression doxycycline-inducible M17.shAHR cells treated with DMSO vehicle or AHR agonist FICZ (0.5 $\mu$ M)  $\pm$  1 $\mu$ g/ml doxycycline to deplete AHR expression. **B)** Densitometric quantification of TDP-43 from M17.shAHR lysates from panel A. N= 3. Note that the difference between untreated samples (first bar) and samples treated only with shAHR does not reach significance. For each, mean  $\pm$  SEM, ANOVA w/ Tukey's; \*\*\* P<0.001, \* P<0.05.

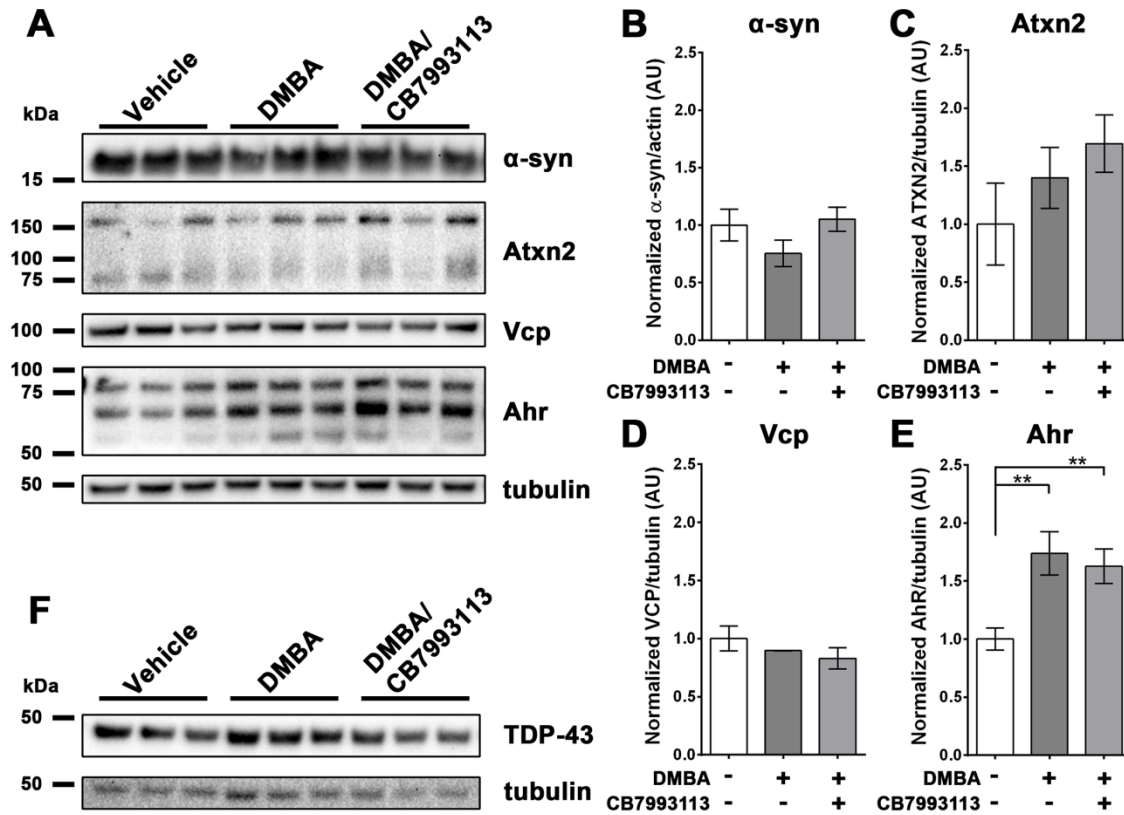

**Supplemental Figure 2. The effect on TDP-43 protein levels in the brain of peripheral exposure to AHR agonists is not observed with other disease related proteins. A)** Immunoblots of cortical tissue from mice exposed by intraperitoneal (i.p) injection to the AHR toxicant 7,12-Dimethylbenz(a)anthracene (DMBA). Blots were probed with anti- $\alpha$ -synuclein, anti-ATXN2, anti-VCP, anti-AHR and anti-tubulin antibodies. Densitometric analysis from these immunoblots is shown respectively in panels **B**, **C**, **D** and **E** indicating that other disease related proteins are not elevated in the brains of mice treated peripherally with an agonist of the AHR alone. These data suggest that TDP-43 exhibits a selective response to AHR activation. N= 3 mice per group; mean  $\pm$  SEM, ANOVA w/ Tukey's; \*\* P<0.01. **F)** Immunoblots of liver tissue from mice exposed by intraperitoneal (i.p) injection to the AHR toxicant 7,12-Dimethylbenz(a)anthracene (DMBA). Blots were probed with anti-TDP-43 and anti-tubulin antibodies.

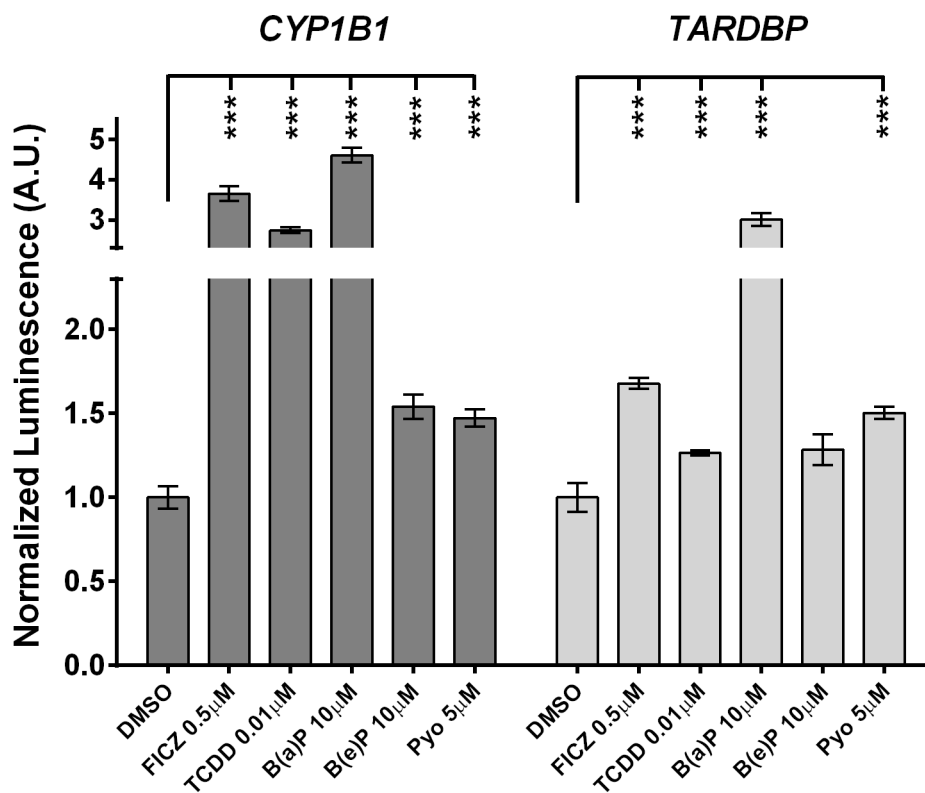

**Supplemental Figure 3. TARDBP promoter is activated by AHR agonism.** Luciferase luminescence from human H4 cells transfected with the luciferase reporter *CYP1B1*\_-3.8kb/*luc2* positive controls, and human *TARDBP*\_-4.1kb/*luc2*, treated (72 hrs) with the AHR agonist 6-Formylindolo[3,2-b]carbazole (FICZ; 0.5µM) and the potent environmental toxins the dioxin-like 2,3,7,8-Tetrachlorodibenzo-p-dioxin (TCDD; 0.01µM), the polyaromatic hydrocarbon Benzo[a]pyrene (B(a)P; 10µM), and its and the non-toxic congener Benzo[e]pyrene (B(e)P; 10µM), and the bacterial toxin pyocyanin (Pyo; 5µM). N= 4. For each, mean ± SEM, ANOVA w/ Tukey's; \*\*\* P<0.001.

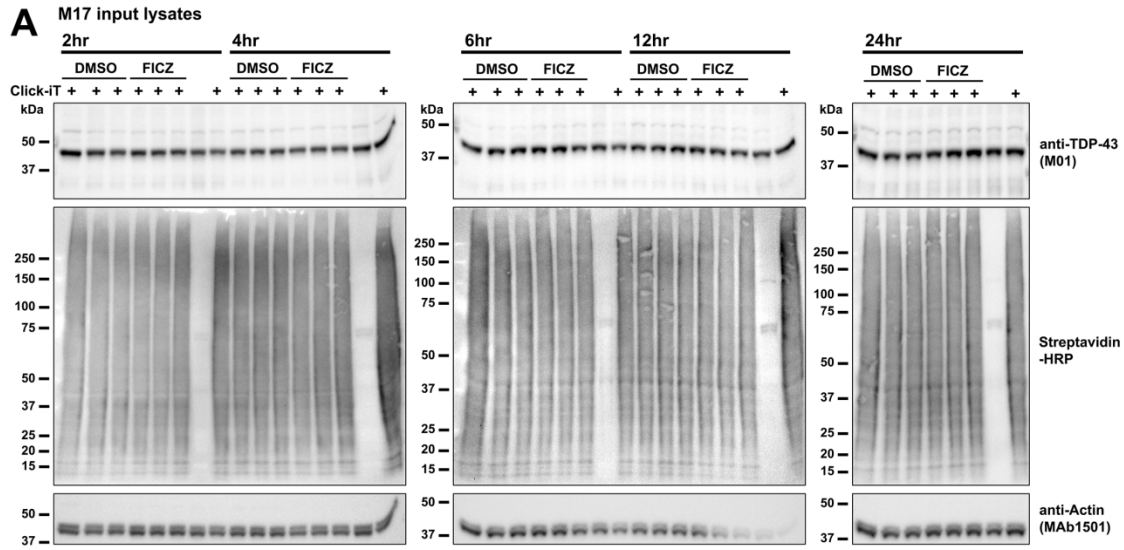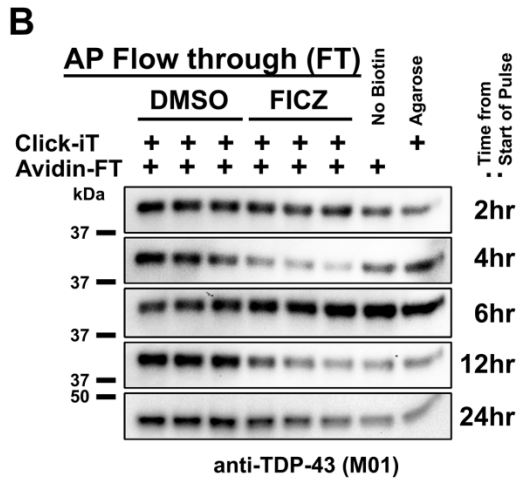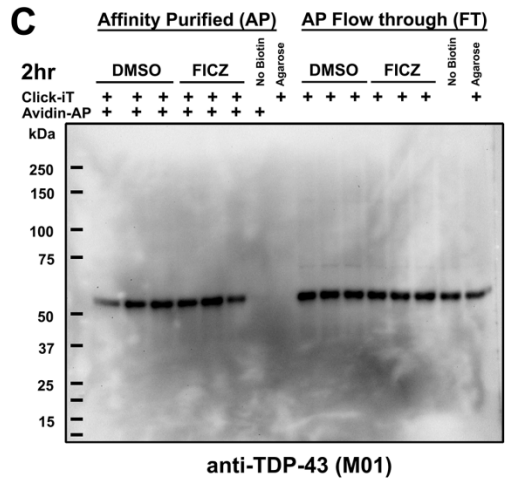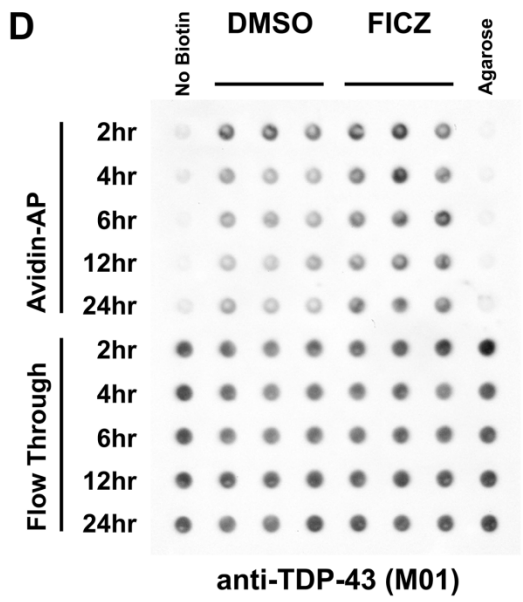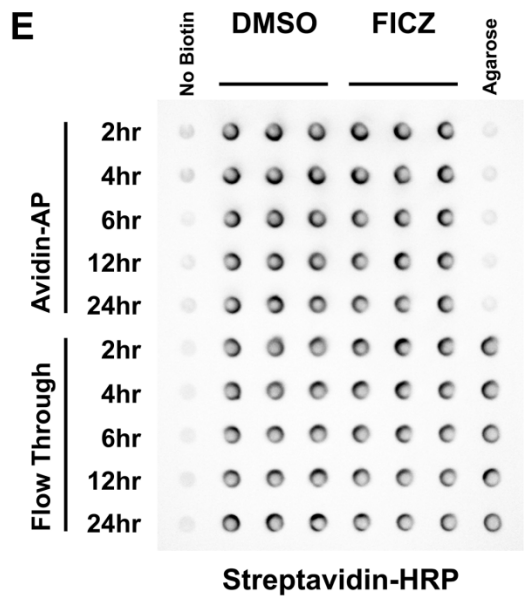

**Supplemental Figure 4. Click-iT pulse-chase labelling of nascent proteins in differentiated M17 cells. A)**

Immunoblots of the “clicked” M17 input lysates (those lysates processed using the Click-iT chemistry to tag AHA-incorporated nascent proteins with Biotin-alkyne) treated with DMSO vehicle or 0.5 $\mu$ M FICZ at each time point from Start of Pulse. Blots were probed using anti-TARDBP antibodies, Streptavidin-HRP and anti-Actin antibodies. These “clicked” lysates were then used for Avidin-agarose affinity purification in Figure 4A. NB for each time point, a representative sample was processed using the Click-iT chemistry in the absence of the Biotin-alkyne chemoselective ligation tag, this sample was then used in an affinity purification against avidin-agarose beads as a negative control. As such, these samples were not detected using the Streptavidin-HRP probe. **B)** Immunoblots, probed with anti-TARDBP antibodies, of the unbound flow throughs from the Avidin-agarose affinity purifications of “clicked” lysates from each time point shown in Figure 4A. **C)** A long exposure of the immunoblot of the Avidin agarose affinity purified (Avidin-AP) and flow through (FT) material from the “clicked” M17 lysates treated with DMSO vehicle or 0.5 $\mu$ M FICZ at the 2hr from Start of Pulse time point indicating the specificity of the anti-TARDBP antibody used in the subsequent dot blots. Dot blot of Avidin-agarose affinity purified (Avidin-AP) and flow through (FT) material from “clicked” lysates treated with DMSO vehicle or 0.5 $\mu$ M FICZ, with a 2 hour pulse of Click-iT AHA-labelling of endogenous nascent proteins then (by column) periods of culture in the absence of the Click-iT metabolite to chase degradation of AHA labelled nascent proteins. Blots are probed with anti-TARDBP antibody **(D)** and then Streptavidin-HRP **(E)**. As previously described, the negative controls for Avidin-AP include a representative sample from each time point, processed using the Click-iT chemistry but in the absence of the Biotin-alkyne chemoselective ligation tag, affinity purified against avidin-agarose (column 1: “No Biotin”) and a “clicked” representative sample ligated using the Biotin-alkyne affinity purified against control agarose resin (column 8: “Agarose”).

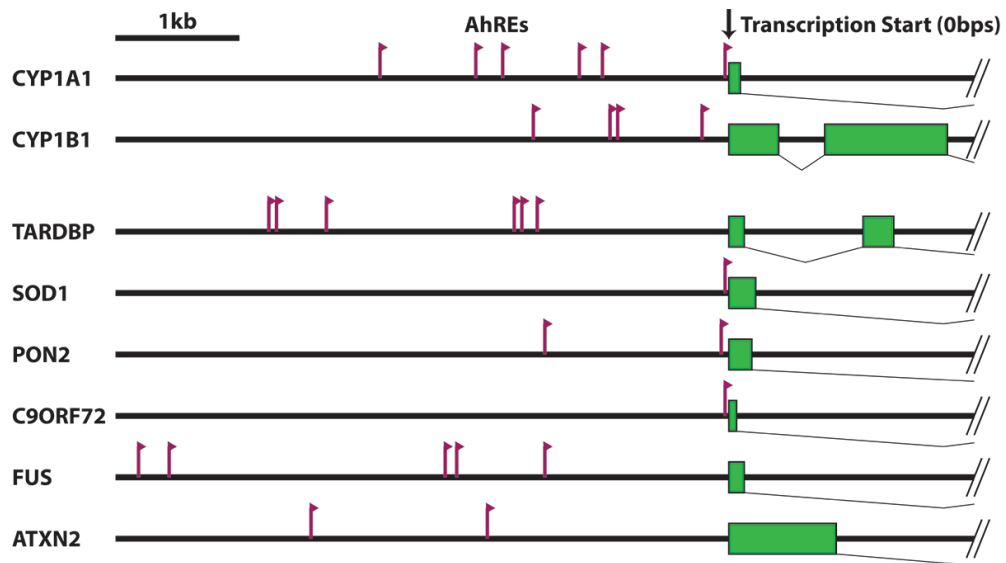

**Supplemental Figure 5.** Schematic representation of sense AHRE consensus sites “GCGTG” (red flags) of human *CYP1A1* and *CYP1B1* AHR responsive genes and the ALS-relevant genes *TARDBP*, *SOD1*, *PON2*, *C9ORF72*, *FUS* and *ATXN2*, assayed for changes in transcript levels in figure 2,. Green boxes are exons.
